# Supplementary material for: Weight Loss Induced by Bariatric Surgery Restricts Hepatic GDF15 Expression
Source: Hindawi journal article supplement (doi:10.1155/2018/7108075), 2018-11-08

Supplementary Figure 1

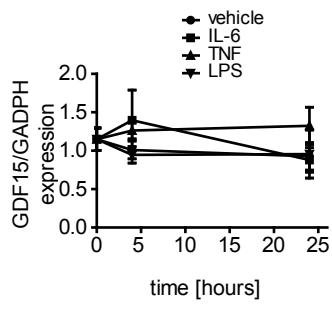

Supplementary Figure 2

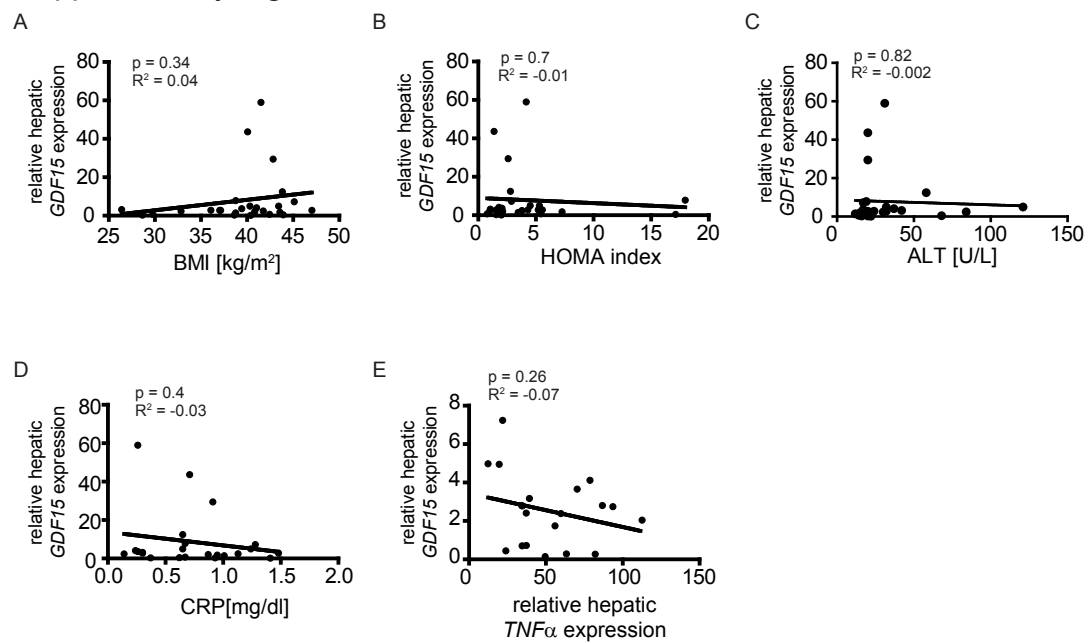

Supplement: f1 [file 7108075.f1.pdf]
